# Supplementary material
Source: publisher figshare collection journal article supplement (https://tandf.figshare.com/ndownloader/files/13899638)
Supplement: Supplementary file 1 [file 13899638]

***Electronic Supplementary Information***

Sara K. Hurley,a Nicole M. Cutrone,a Karl R. Fath,b Harrison T. Pajovich,a Jeremy Garcia,b Andrew M.

Smith,a and Ipsita A. Banerjeea*

a *Department of Chemistry, Fordham University 441 East Fordham Road, Bronx, New York 10458, USA*

b *Department of Biology, Queens College, City University of New York, 65-30 Kissena Boulevard, Flushing, New York 11367, USA*

* Corresponding Author: Ipsita A. Banerjee

**Figure 1.** (a)1H NMR spectrum of 3-phenyl-N-(3-((4-(3-phenylisoxazole-5-

carboxamido)butyl)amino)propyl)isoxazole-5-carboxamide (SP-POC) (b) 13C NMR spectrum of SP-POC

**Figure 2**. FTIR spectra of Topotecan (TOPO) before and after entrapment in SP-POC-WSG assemblies

**Figure 3.** AFM amplitude image of TOPO entrapped in SP-POC-WSG assemblies showing the aggregation behavior of TOPO. (Scale Bar = 200 nm)


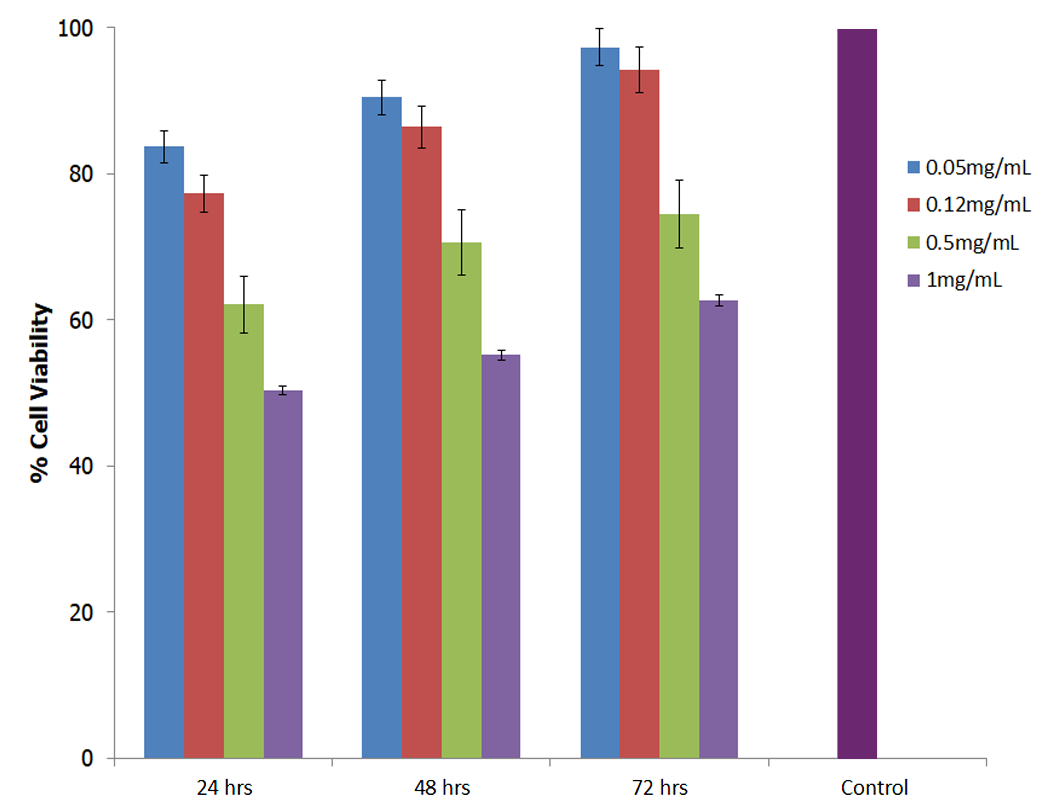


**Figure 4.** Cell viability of neonatal fibroblasts in the presence of SP-POC-WSG assemblies.
